# Supplementary material for: Genome-Wide Analysis to Identify Pathways Affecting Telomere-Initiated Senescence in Budding Yeast
Source: PubMed Central journal article supplement (PMC3276134; doi:10.1534/g3.111.000216), 2011-08-01
Supplement: supp_1.3.197_FigureS1.pdf [file supp_1.3.197_FigureS1.pdf]

**A**

|                    |                     |                      |                     |                    |                     |                      |                      |                     |                     |                      |                    |
|--------------------|---------------------|----------------------|---------------------|--------------------|---------------------|----------------------|----------------------|---------------------|---------------------|----------------------|--------------------|
| <i>his3Δ est1Δ</i> | <i>his3Δ est1Δ</i>  | <i>his3Δ est1Δ</i>   | <i>his3Δ est1Δ</i>  | <i>his3Δ est1Δ</i> | <i>his3Δ est1Δ</i>  | <i>his3Δ est1Δ</i>   | <i>his3Δ est1Δ</i>   | <i>his3Δ est1Δ</i>  | <i>his3Δ est1Δ</i>  | <i>his3Δ est1Δ</i>   | <i>his3Δ est1Δ</i> |
| <i>his3Δ est1Δ</i> | <i>est1Δ est1Δ</i>  | <i>rad57Δ est1Δ</i>  | <i>est3Δ est1Δ</i>  | <i>tel1Δ est1Δ</i> | <i>rad55Δ est1Δ</i> | <i>rad54Δ est1Δ</i>  | <i>asf1Δ est1Δ</i>   | <i>xrs2Δ est1Δ</i>  | <i>dcc1Δ est1Δ</i>  | <i>rif1Δ est1Δ</i>   | <i>his3Δ est1Δ</i> |
| <i>his3Δ est1Δ</i> | <i>rif2Δ est1Δ</i>  | <i>elg1Δ est1Δ</i>   | <i>pol32Δ est1Δ</i> | <i>upf2Δ est1Δ</i> | <i>upf3Δ est1Δ</i>  | <i>cdd73Δ est1Δ</i>  | <i>ydl118Δ est1Δ</i> | <i>sum1Δ est1Δ</i>  | <i>rfm1Δ est1Δ</i>  | <i>rtf1Δ est1Δ</i>   | <i>his3Δ est1Δ</i> |
| <i>his3Δ est1Δ</i> | <i>hst3Δ est1Δ</i>  | <i>spt21Δ est1Δ</i>  | <i>hmo1Δ est1Δ</i>  | <i>mot3Δ est1Δ</i> | <i>upf1Δ est1Δ</i>  | <i>kem1Δ est1Δ</i>   | <i>lea1Δ est1Δ</i>   | <i>mak10Δ est1Δ</i> | <i>mak31Δ est1Δ</i> | <i>mak3Δ est1Δ</i>   | <i>his3Δ est1Δ</i> |
| <i>his3Δ est1Δ</i> | <i>rrp8Δ est1Δ</i>  | <i>mrpl44Δ est1Δ</i> | <i>csm3Δ est1Δ</i>  | <i>sla1Δ est1Δ</i> | <i>rad27Δ est1Δ</i> | <i>chk1Δ est1Δ</i>   | <i>ebs1Δ est1Δ</i>   | <i>rad9Δ est1Δ</i>  | <i>rad24Δ est1Δ</i> | <i>rad52Δ est1Δ</i>  | <i>his3Δ est1Δ</i> |
| <i>his3Δ est1Δ</i> | <i>mre11Δ est1Δ</i> | <i>exo1Δ est1Δ</i>   | <i>rad17Δ est1Δ</i> | <i>hex3Δ est1Δ</i> | <i>bnr1Δ est1Δ</i>  | <i>rho4Δ est1Δ</i>   | <i>ede1Δ est1Δ</i>   | <i>bmh1Δ est1Δ</i>  | <i>bmh2Δ est1Δ</i>  | <i>ddc1Δ est1Δ</i>   | <i>his3Δ est1Δ</i> |
| <i>his3Δ est1Δ</i> | <i>ctf18Δ est1Δ</i> | <i>ctf8Δ est1Δ</i>   | <i>slx8Δ est1Δ</i>  | <i>tsa1Δ est1Δ</i> | <i>sgs1Δ est1Δ</i>  | <i>rtt107Δ est1Δ</i> | <i>rtt101Δ est1Δ</i> | <i>mms1Δ est1Δ</i>  | <i>mms22Δ est1Δ</i> | <i>rtt109Δ est1Δ</i> | <i>his3Δ est1Δ</i> |
| <i>his3Δ est1Δ</i> | <i>his3Δ est1Δ</i>  | <i>his3Δ est1Δ</i>   | <i>his3Δ est1Δ</i>  | <i>his3Δ est1Δ</i> | <i>his3Δ est1Δ</i>  | <i>his3Δ est1Δ</i>   | <i>his3Δ est1Δ</i>   | <i>his3Δ est1Δ</i>  | <i>his3Δ est1Δ</i>  | <i>his3Δ est1Δ</i>   | <i>his3Δ est1Δ</i> |

Red: Telomere length (Askree *et al.* 2004; Gatbonton *et al.* 2006);

Purple: DNA replication or repair (Collins *et al.* 2008);

Green: Genes of general interest.

**B Passage1**

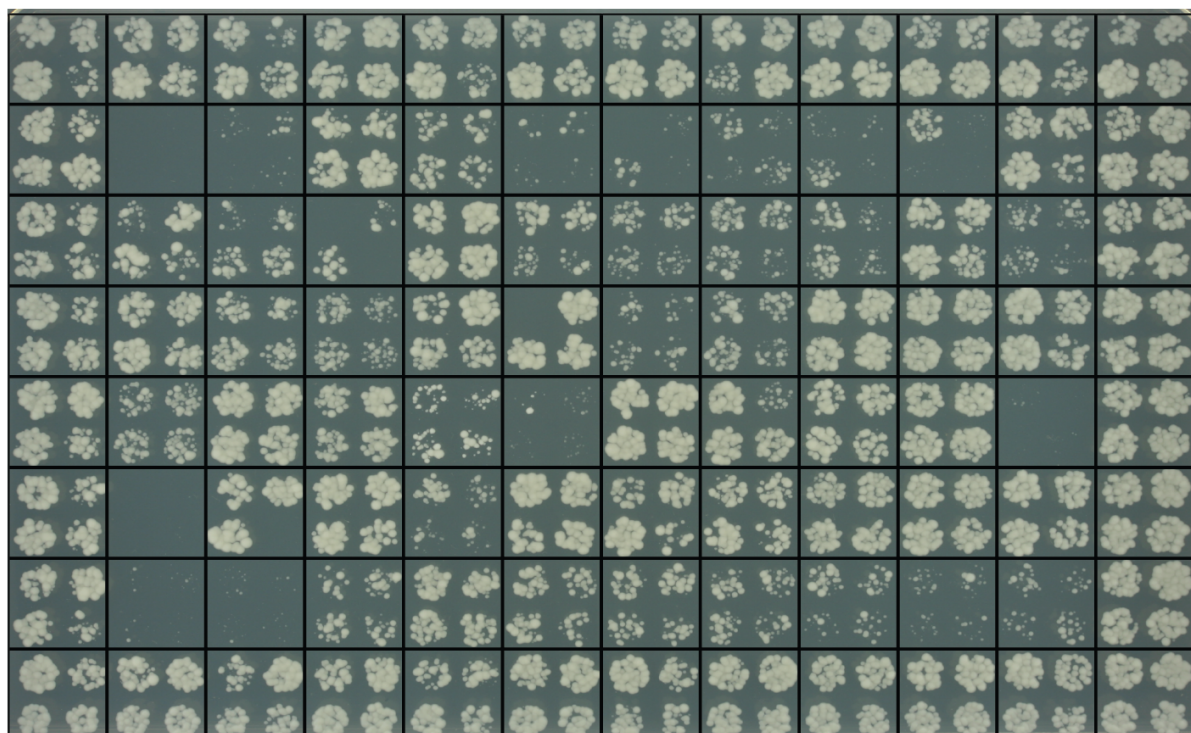

**Figure S1** 60 *yfgΔ est1Δ* strains arrayed in quadruplicate on a 384 format plate. (A) Strain map indicating the position of 60 genotypes on the 384 format plate in panel B; four replicates drawn in light grey. Red, purple, and green names indicate the reason for choosing particular genes for this study. (B) Photograph of a 384 format plate at passage 1 (48 hours after inoculation) from the liquid procedure (Figure 1A)
