# Supplementary material for: Genome-Wide Analysis to Identify Pathways Affecting Telomere-Initiated Senescence in Budding Yeast
Source: PubMed Central journal article supplement (PMC3276134; doi:10.1534/g3.111.000216), 2011-08-01
Supplement: supp_1.3.197_FigureS3.pdf [file supp_1.3.197_FigureS3.pdf]

**A**

|                    | P1  | P2  | P3  | P4  | P5  | P6  | P7  | P8  | P9  | P10 | P11 | P12 | P13 |
|--------------------|-----|-----|-----|-----|-----|-----|-----|-----|-----|-----|-----|-----|-----|
| WT                 | 314 | 330 | 334 | 344 | 330 | 384 | 460 | 442 | 436 | 372 | 286 | 610 | 400 |
| <i>est3Δ</i>       | 369 | 240 | 137 | 15  | 7   | 29  | 510 | 282 | 362 | 482 | 292 | 378 | 399 |
| <i>est1Δ</i>       | 410 | 269 | 143 | 23  | 9   | 44  | 521 | 301 | 332 | 387 | 297 | 400 | 365 |
| <i>est3Δ est1Δ</i> | 212 | 120 | 85  | 19  | 76  | 110 | 310 | 230 | 305 | 386 | 255 | 388 | 303 |

**B**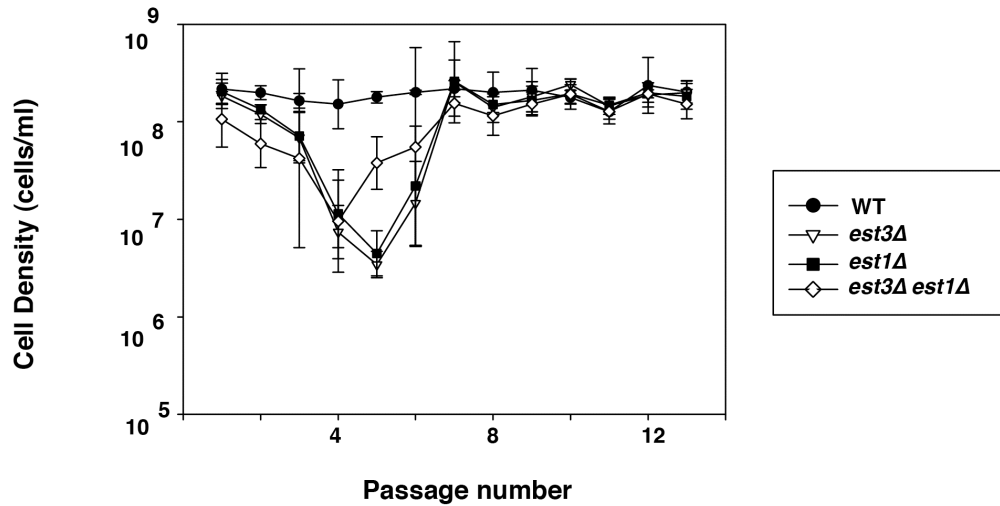

**Figure S3** Low through-put senescence experiment in the W303 genetic background. (A) Six independent strains of each genotype in the W303 background were taken directly from germination plates and grown in liquid culture. Cell densities were counted every 23 hrs, followed by dilution to  $5 \times 10^5$  cells/ml and continued incubation. Cell density reached by cells with the same genotype after 23 hours were recorded and averaged. The dilution factors at each passage were calculated and showed in the table, genotypes are indicated. (B) The data from (A) were plotted. Each symbol represents the average cell density reached by cells with the same genotype after 23 hours and the error bars represent the standard deviations.
