# Supplementary material for: Genome-Wide Analysis to Identify Pathways Affecting Telomere-Initiated Senescence in Budding Yeast
Source: PubMed Central journal article supplement (PMC3276134; doi:10.1534/g3.111.000216), 2011-08-01
Supplement: supp_1.3.197_FigureS4.pdf [file supp_1.3.197_FigureS4.pdf]

**A**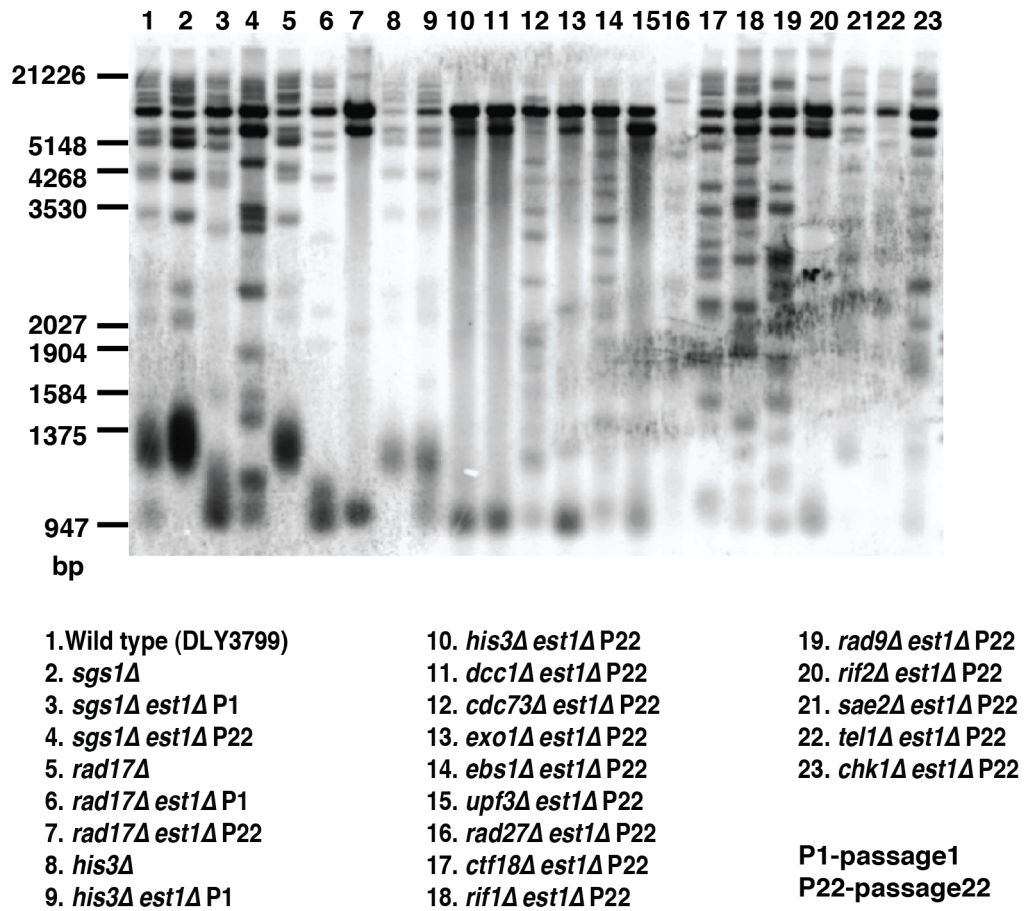

**Figure S4** Survivors were produced by passage 22 in the solid procedure. Genomic DNA prepared from the strains of different genotypes as indicated, digested with *Xho*I and subjected to Southern blot to detect telomeric 'Y' and 'TG' fragments.
