# Supplementary material for: Genome-Wide Analysis to Identify Pathways Affecting Telomere-Initiated Senescence in Budding Yeast
Source: PubMed Central journal article supplement (PMC3276134; doi:10.1534/g3.111.000216), 2011-08-01
Supplement: supp_1.3.197_FigureS5.pdf [file supp_1.3.197_FigureS5.pdf]

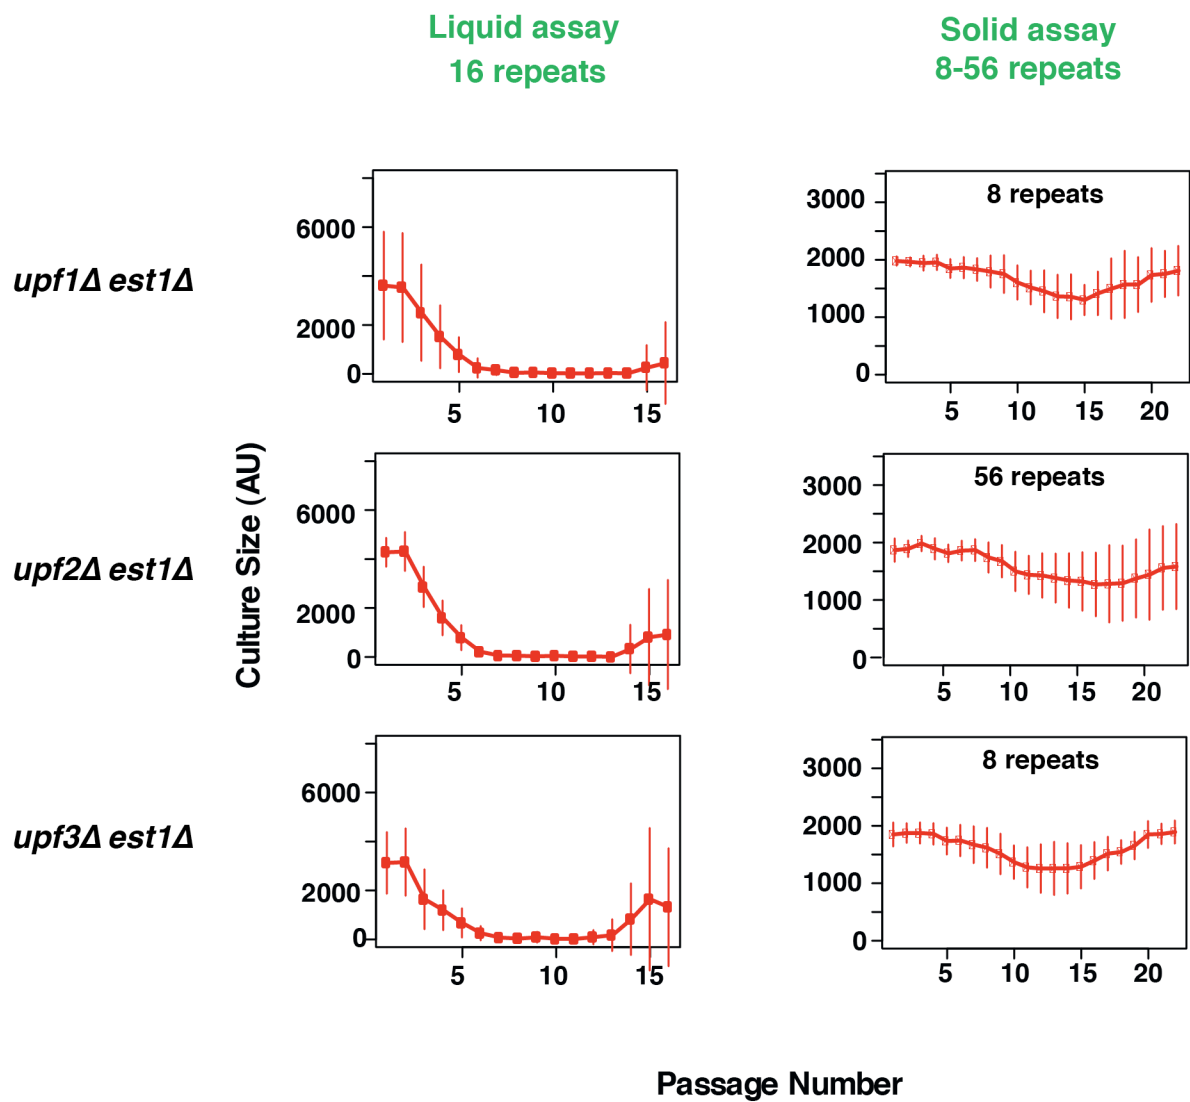

**Figure S5** Nonsense mediated decay genes had consistent MDPs in both screens. *UPF1*, *UPF2*, and *UPF3* gene deletions had consistent MDPs patterns in both the liquid procedure and in the solid procedure. Replicate number and experiment type are indicated in green text.
