# Supplementary material for: Genome-Wide Analysis to Identify Pathways Affecting Telomere-Initiated Senescence in Budding Yeast
Source: PubMed Central journal article supplement (PMC3276134; doi:10.1534/g3.111.000216), 2011-08-01
Supplement: supp_1.3.197_FigureS8.pdf [file supp_1.3.197_FigureS8.pdf]

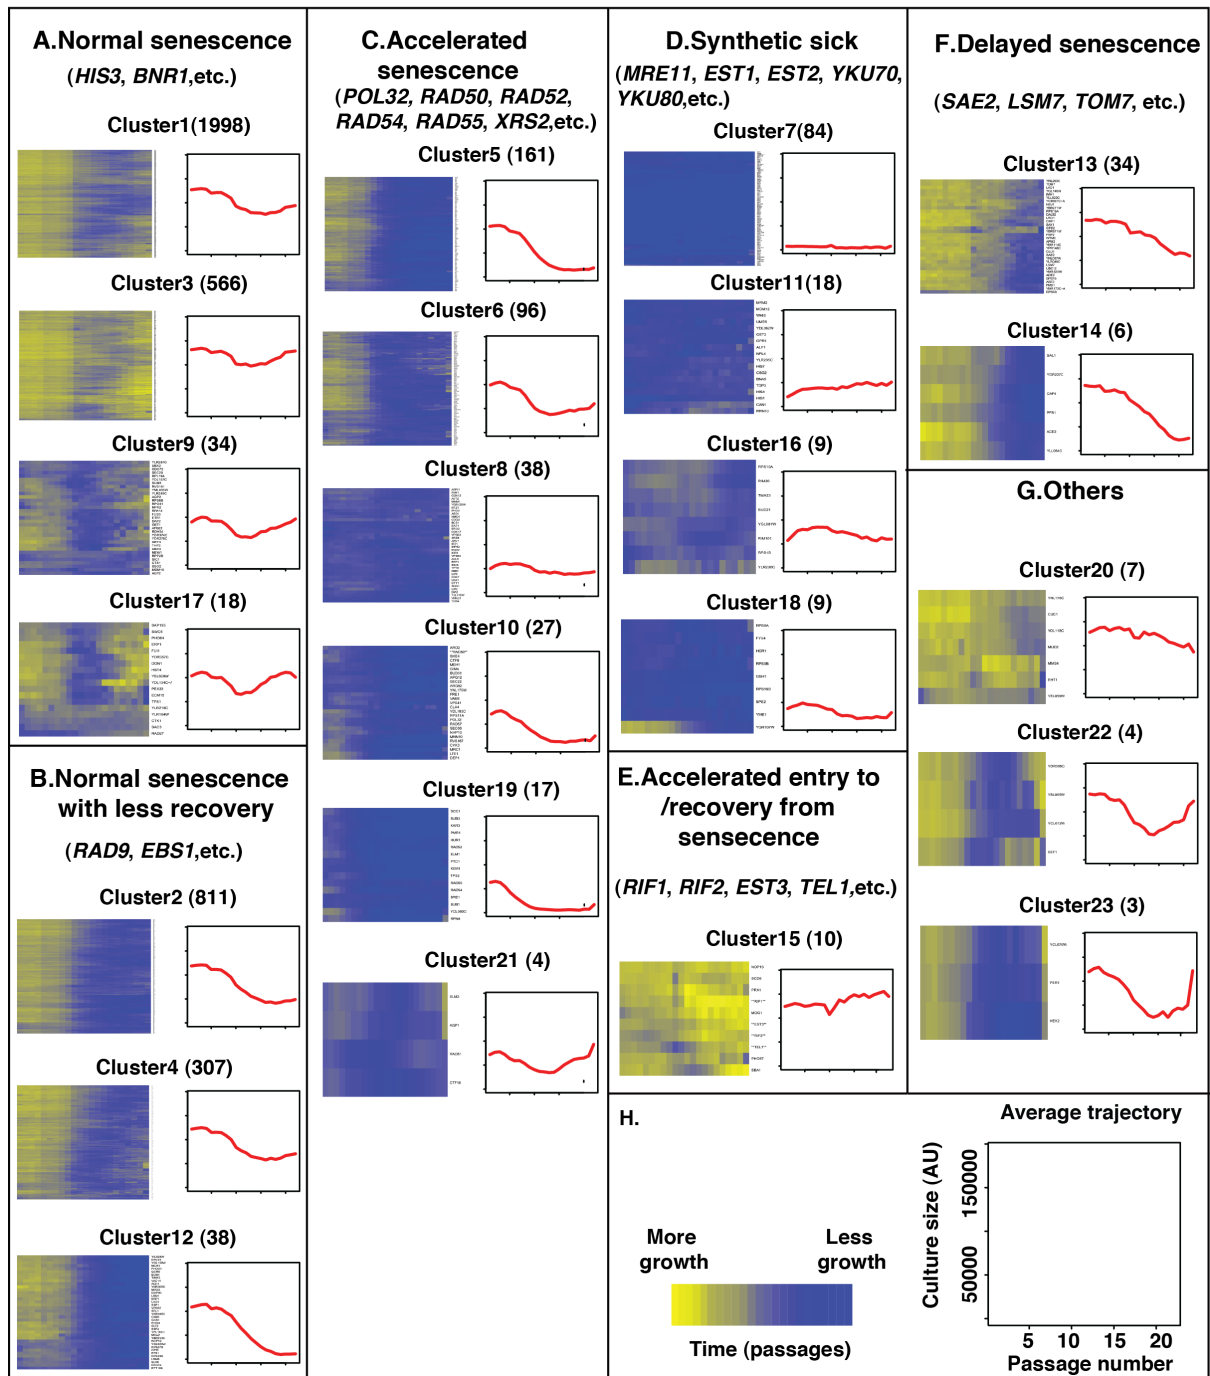

**Figure S8** Unsupervised hierarchical QT clustering identifies 23 different MDP classes. Heat map representation of cluster MDPs on left, average MDPs on right. 23 automatically generated classes were combined manually into 8 functionally meaningful classifications (A-H).
