# Supplementary material for: Genome-Wide Analysis to Identify Pathways Affecting Telomere-Initiated Senescence in Budding Yeast
Source: PubMed Central journal article supplement (PMC3276134; doi:10.1534/g3.111.000216), 2011-08-01
Supplement: supp_1.3.197_TableS1.pdf [file supp_1.3.197_TableS1.pdf]

**Table S1 60 genes tested by liquid senescence assay**

| Gene               | *Senescence phenotype | **Telomere length screens | Gene ontology annotation                              | ***References                                                                                                                                                                                   |
|--------------------|-----------------------|---------------------------|-------------------------------------------------------|-------------------------------------------------------------------------------------------------------------------------------------------------------------------------------------------------|
| <i>EST3</i>        | AERS                  | VS                        | telomerase component                                  | <i>est2Δ est3Δ/est1Δ est3Δ/tlc1Δ est3Δ</i> showed normal senescence (LENDVAY <i>et al.</i> 1996)                                                                                                |
| <i>RIF1</i>        | AERS                  | VL                        | telomere binding protein                              | <i>rif1Δ est2Δ</i> showed normal senescence (ANBALAGAN S <i>et al.</i> 2011); <i>rif1Δ est2Δ</i> accelerated entry to /recovery from senescence (CHANG <i>et al.</i> 2011)                      |
| <i>RIF2</i>        | AERS                  | VL                        | telomere binding protein                              | <i>rif2Δ est2Δ</i> accelerated entry to/recovery from senescence (CHANG <i>et al.</i> 2011)                                                                                                     |
| <i>EST1</i>        | AS                    | VS                        | telomerase component                                  |                                                                                                                                                                                                 |
| <i>MRE11</i>       | AS                    | VS                        | DNA repair/ MRX complex                               | Normal (LE <i>et al.</i> 1999)                                                                                                                                                                  |
| <i>XRS2</i>        | AS                    | VS                        | DNA repair/MRX complex                                | Normal (LE <i>et al.</i> 1999)                                                                                                                                                                  |
| <i>RAD52</i>       | AS                    |                           | recombinational repair of double-strand breaks in DNA | <i>rad52Δ est1Δ and rad52Δ tlc1Δ</i> accelerated senescence (ABDALLAH <i>et al.</i> 2010; LE <i>et al.</i> 1999; LEBEL <i>et al.</i> 2009; LEE <i>et al.</i> 2007; LUNDBLAD and BLACKBURN 1993) |
| <i>RAD54</i>       | AS                    |                           | recombinational repair of double-strand breaks in DNA | <i>rad54Δ tlc1Δ</i> has severe growth defect (LE <i>et al.</i> 1999)                                                                                                                            |
| <i>RAD55</i>       | AS                    |                           | recombinational repair of double-strand breaks in DNA |                                                                                                                                                                                                 |
| <i>RAD57</i>       | AS                    |                           | recombinational repair of double-strand breaks in DNA | <i>rad57Δ tlc1Δ</i> has severe growth defect (LE <i>et al.</i> 1999)                                                                                                                            |
| <i>UPF1 (NAM7)</i> | AS                    | VS                        | nonsense mediated decay                               | <i>upf1Δ</i> with <i>tlc1Δ/est1Δ/est2Δ/est3Δ</i> delayed senescence measured by a different method (ENOMOTO <i>et al.</i> 2004)                                                                 |
| <i>UPF2 (NMD2)</i> | AS                    | S                         | nonsense mediated decay                               | <i>upf2Δ</i> with <i>tlc1Δ/est1Δ/est2Δ/est3Δ</i> delayed senescence measured by a different method (ENOMOTO <i>et al.</i> 2004)                                                                 |
| <i>UPF3</i>        | AS                    | S                         | nonsense mediated decay                               | <i>upf3Δ</i> with <i>tlc1Δ/est1Δ/est2Δ/est3Δ</i> delayed senescence measured by a different method (ENOMOTO <i>et al.</i> 2004)                                                                 |

|                    |    |                     |                                                                                     |                                                                                               |
|--------------------|----|---------------------|-------------------------------------------------------------------------------------|-----------------------------------------------------------------------------------------------|
| <i>DCC1</i>        | AS | ss                  | Sister chromatid cohesion                                                           |                                                                                               |
| <i>CTF18</i>       | AS | Literature reported | Sister chromatid cohesion                                                           |                                                                                               |
| <i>CTF8</i>        | AS | ss                  | Sister chromatid cohesion                                                           |                                                                                               |
| <i>ELG1</i>        | AS | L                   | RFC complex                                                                         |                                                                                               |
| <i>RTT101</i>      | AS |                     | Histone acetyltransferase/involved in NHEJ                                          |                                                                                               |
| <i>RTT109</i>      | AS |                     | Histone acetyltransferase/involved in NHEJ                                          |                                                                                               |
| <i>RTT107</i>      | AS |                     | Mms22-dependent DNA repair during S phase/interacts with Mms22p and Slx4p           |                                                                                               |
| <i>MMS1</i>        | AS |                     | Subunit of an E3 ubiquitin ligase complex/resolving replication intermediates       | <i>mms1Δ tlc1Δ</i> accelerated senescence and failed to recover (ABDALLAH <i>et al.</i> 2010) |
| <i>MMS22</i>       | AS |                     | Ubiquitin-conjugating enzyme variant involved in error-free post replication repair |                                                                                               |
| <i>CDC73</i>       | AS | S                   | PAF1 complex                                                                        |                                                                                               |
| <i>RTF1</i>        | AS | ss                  | PAF1 complex                                                                        |                                                                                               |
| <i>SLX8</i>        | AS | sl,                 | Subunit of the Slx5-Slx8 SUMO-targeted ubiquitin ligase (STUbL) complex             | <i>slx8Δ tlc1Δ</i> accelerated senescence (AZAM <i>et al.</i> 2006)                           |
| <i>SLX5 (HEX3)</i> | AS |                     | Subunit of the Slx5-Slx8 SUMO-targeted ubiquitin ligase (STUbL) complex             | <i>slx5Δ tlc1Δ</i> accelerated senescence (AZAM <i>et al.</i> 2006)                           |

|               |    |    |                                                                             |                                                                                                                                                                                                                                                                                        |
|---------------|----|----|-----------------------------------------------------------------------------|----------------------------------------------------------------------------------------------------------------------------------------------------------------------------------------------------------------------------------------------------------------------------------------|
| <i>RRP8</i>   | AS | L  | pre-rRNA processing/methyltransferase                                       |                                                                                                                                                                                                                                                                                        |
| <i>SPT21</i>  | AS | ss | regulator of histone gene transcription                                     |                                                                                                                                                                                                                                                                                        |
| <i>POL32</i>  | AS | sl | Polymerase delta subunit                                                    | <i>pol32Δ tlc1Δ</i> accelerated senescence (LYDEARD <i>et al.</i> 2007)                                                                                                                                                                                                                |
| <i>SGS1</i>   | AS |    | Nucleolar DNA helicase of the RecQ family                                   | <i>sgs1Δ tlc1Δ</i> accelerated senescence (AZAM <i>et al.</i> 2006; LEE <i>et al.</i> 2007)                                                                                                                                                                                            |
| <i>RAD27</i>  | AS | VL | flap-endonuclease                                                           | <i>rad27Δ</i> with <i>est1Δ/tlc1Δ/est3Δ/cdc13-2</i> accelerated senescence (PARENTEAU and WELLINGER 2002)                                                                                                                                                                              |
| <i>HMO1</i>   | AS | L  | HMG-box protein                                                             |                                                                                                                                                                                                                                                                                        |
| <i>TEL1</i>   | AS | VS | PIK homologue                                                               | <i>tel1Δ tlc1Δ</i> showed normal senescence (ENOMOTO <i>et al.</i> 2002) ; <i>tel1Δ tlc1Δ</i> delayed senescence (RITCHIE <i>et al.</i> 1999), <i>tel1Δ tlc1Δ mec1Δ sml1Δ</i> is normal (CHAN <i>et al.</i> 2001); <i>tel1Δ tlc1Δ</i> delayed senescence (ABDALLAH <i>et al.</i> 2010) |
| <i>KEM1</i>   | AS | S  | RNA degradation                                                             |                                                                                                                                                                                                                                                                                        |
| <i>YDL118</i> | AS | ss | Unknown                                                                     |                                                                                                                                                                                                                                                                                        |
| <i>LEA1</i>   | AS | L  | RNA splicing                                                                |                                                                                                                                                                                                                                                                                        |
| <i>SUM1</i>   | AS | S  | SUM1/RFM1 repressor complex                                                 |                                                                                                                                                                                                                                                                                        |
| <i>RFM1</i>   | AS | S  | SUM1/RFM1 repressor complex                                                 |                                                                                                                                                                                                                                                                                        |
| <i>TSA1</i>   | AS |    | Thioredoxin peroxidase/ribosome-associated and free cytoplasmic antioxidant |                                                                                                                                                                                                                                                                                        |
| <i>ASF1</i>   | AS |    | Nucleosome assembly factor/chromatin assembly and disassembly               |                                                                                                                                                                                                                                                                                        |
| <i>SLA1</i>   | AS |    | Cytoskeletal binding protein                                                |                                                                                                                                                                                                                                                                                        |

|               |        |                     |                                                                          |                                                                           |
|---------------|--------|---------------------|--------------------------------------------------------------------------|---------------------------------------------------------------------------|
| <i>RHO4</i>   | AS     |                     | Non-essential small GTPase of the Rho/Rac subfamily of Ras-like proteins |                                                                           |
| <i>EDE1</i>   | AS     |                     | Key endocytic protein                                                    |                                                                           |
| <i>EXO1</i>   | Normal | Literature reported | 5'-3' exonuclease and flap-endonuclease                                  | <i>exo1Δ tlc1Δ</i> delayed senescence (MARINGELE and LYDALL 2004)         |
| <i>EBS1</i>   | Normal | ss                  | nonsense mediated decay                                                  |                                                                           |
| <i>RAD9</i>   | Normal | Literature reported | DNA damage checkpoint effector                                           | <i>rad9Δ tlc1Δ</i> had less G2/M arrested cells (IJPMA and GREIDER 2003)  |
| <i>RAD17</i>  | Normal | Literature reported | DNA damage checkpoint effector                                           |                                                                           |
| <i>DDC1</i>   | Normal | Literature reported | DNA damage checkpoint effector                                           |                                                                           |
| <i>RAD24</i>  | Normal | Literature reported | DNA damage checkpoint effector                                           | <i>rad24Δ tlc1Δ</i> had less G2/M arrested cells (IJPMA and GREIDER 2003) |
| <i>CHK1</i>   | Normal |                     | DNA damage checkpoint effector                                           |                                                                           |
| <i>BMH1</i>   | Normal | Literature reported | 14-3-3 protein                                                           |                                                                           |
| <i>BMH2</i>   | Normal | Literature reported | 14-3-3 protein                                                           |                                                                           |
| <i>MRPL44</i> | Normal | ss                  | mitochondrial ribosomal protein                                          |                                                                           |
| <i>MOT3</i>   | Normal | ss                  | POLII transcription                                                      |                                                                           |
| <i>HST3</i>   | Normal |                     | Member of the Sir2 family of NAD(+)-dependent protein deacetylases       |                                                                           |
| <i>CSM3</i>   | Normal |                     | Replication fork associated factor                                       |                                                                           |
| <i>BNR1</i>   | Normal |                     | Formin                                                                   |                                                                           |
| <i>HIS3</i>   | Normal |                     | Imidazoleglycerol-phosphate dehydratase                                  | Control strain                                                            |
| <i>MAK3</i>   | Normal | L                   | N-terminal acetyltransferase complex                                     |                                                                           |
| <i>MAK10</i>  | Normal | L                   | N-terminal acetyltransferase complex                                     |                                                                           |
| <i>MAK31</i>  | Normal | L                   | N-terminal acetyltransferase complex                                     |                                                                           |

---

Legend: Examining of the 60 genes selected for the liquid procedure in this study. The references quoted were indicated in the table and included below.

\*Senescence phenotype abbreviations: AS- accelerated senescence, AERS-accelerated entry to and recovery from senescence.

Normal: normal entry to and recovery from senescence.

\*\* Telomere phenotype abbreviations (ASKREE *et al.* 2004; GATBONTON *et al.* 2006; SHACHAR *et al.* 2008): VS - very short, S - short, ss - slightly short, sl - slightly long, L - long, VL - very long.

\*\*\* Conflicts in data may be due to differences in ways senescence was measured.

## REFERENCES

- ABDALLAH, P., P. LUCIANO, K. W. RUNGE, M. LISBY, V. GELI *et al.*, 2010 A two-step model for senescence triggered by a single critically short telomere (vol 11, pg 988, 2009). *Nature Cell Biology* **12**: 520-520.
- ANBALAGAN S, BONETTI D, LUCCHINI G and L. MP., 2011 Rif1 Supports the Function of the CST Complex in Yeast Telomere Capping. *Plos Genetics* **7**.
- ASKREE, S. H., T. YEHUDA, S. SMOLIKOV, R. GUREVICH, J. HAWK *et al.*, 2004 A genome-wide screen for *Saccharomyces cerevisiae* deletion mutants that affect telomere length. *Proceedings of the National Academy of Sciences of the United States of America* **101**: 8658-8663.
- AZAM, M., J. Y. LEE, V. ABRAHAM, R. CHANOUX, K. A. SCHOENLY *et al.*, 2006 Evidence that the *S.cerevisiae* Sgs1 protein facilitates recombinational repair of telomeres during senescence. *Nucleic Acids Research* **34**: 506-516.
- CHAN, S. W. L., J. CHANG, J. PRESCOTT and E. H. BLACKBURN, 2001 Altering telomere structure allows telomerase to act in yeast lacking ATM kinases. *Current Biology* **11**: 1240-1250.
- CHANG, M., J. C. DITTMAR and R. ROTHSTEIN, 2011 Long telomeres are preferentially extended during recombination-mediated telomere maintenance. *Nature structural and molecular biology*.
- ENOMOTO, S., L. GLOWCZEWSKI and J. BERMAN, 2002 MEC3, MEC1, and DDC2 are essential components of a telomere checkpoint pathway required for cell cycle arrest during senescence in *Saccharomyces cerevisiae*. *Molecular Biology of the Cell* **13**: 2626-2638.
- ENOMOTO, S., L. GLOWCZEWSKI, J. LEW-SMITH and J. G. BERMAN, 2004 Telomere cap components influence the rate of senescence in telomerase-deficient yeast cells. *Molecular and Cellular Biology* **24**: 837-845.
- GATBONTON, T., M. IMBESI, M. NELSON, J. M. AKEY, D. M. RUDERFER *et al.*, 2006 Telomere length as a quantitative trait: Genome-wide survey and genetic mapping of telomere length-control genes in yeast. *Plos Genetics* **2**: 304-315.
- IJPMA, A. S., and C. W. GREIDER, 2003 Short telomeres induce a DNA damage response in *Saccharomyces cerevisiae*. *Molecular Biology of the Cell* **14**: 987-1001.
- LE, S., J. K. MOORE, J. E. HABER and C. W. GREIDER, 1999 RAD50 and RAD51 define two pathways that collaborate to maintain telomeres in the absence of telomerase. *Genetics* **152**: 143-152.
- LEBEL, C., E. ROSONINA, D. C. F. SEALEY, F. PRYDE, D. LYDALL *et al.*, 2009 Telomere Maintenance and Survival in *Saccharomyces cerevisiae* in the Absence of Telomerase and RAD52. *Genetics* **182**: 671-684.
- LEE, J. Y., M. KOZAK, J. D. MARTIN, E. PENNOCK and F. B. JOHNSON, 2007 Evidence that a RecQ helicase slows senescence by resolving recombining telomeres. *Plos Biology* **5**: 1334-1344.
- LENDVAY, T. S., D. K. MORRIS, J. SAH, B. BALASUBRAMANIAN and V. LUNDBLAD, 1996 Senescence mutants of *Saccharomyces cerevisiae* with a defect in telomere replication identify three additional EST genes. *Genetics* **144**: 1399-1412.
- LUNDBLAD, V., and E. H. BLACKBURN, 1993 AN ALTERNATIVE PATHWAY FOR YEAST TELOMERE MAINTENANCE RESCUES EST1-SENESCENCE. *Cell* **73**: 347-360.
- LYDEARD, J. R., S. JAIN, M. YAMAGUCHI and J. E. HABER, 2007 Break-induced replication and telomerase-independent telomere maintenance require Pol32. *Nature* **448**: 820-U810.
- MARINGELE, L., and D. LYDALL, 2004 EXO1 plays a role in generating type I and type II survivors in budding yeast. *Genetics* **166**: 1641-1649.
- PARENTEAU, J., and R. J. WELLINGER, 2002 Differential processing of leading- and lagging-strand ends at *Saccharomyces cerevisiae* telomeres revealed by the absence of Rad27p nuclease. *Genetics* **162**: 1583-1594.
- RITCHIE, K. B., J. C. MALLORY and T. D. PETES, 1999 Interactions of TLC1 (which encodes the RNA subunit of telomerase), TEL1, and MEC1 in regulating telomere length in the yeast *Saccharomyces cerevisiae*. *Molecular and Cellular Biology* **19**: 6065-6075.
- SHACHAR, R., L. UNGAR, M. KUPIEC, E. RUPPIN and R. SHARAN, 2008 A systems-level approach to mapping the telomere length maintenance gene circuitry. *Molecular Systems Biology* **4**.
